# Supplementary material
Source: PubMed Central journal article supplement (PMC2464409)
Supplement: supp_23_11_841__1.pdf [file supp_23_11_841__1.pdf]

### Supplement Table 1: MET criteria

The score is 0 if no criterion is met and 1 if a criterion is met.

|             |                                                                                                                       |
|-------------|-----------------------------------------------------------------------------------------------------------------------|
| Criteria    | Airway                                                                                                                |
| Airway      | Threatened                                                                                                            |
| Breathing   | All respiratory arrests<br>Respiratory rate < 5 per minute<br>Respiratory rate > 36 per minute                        |
| Circulation | All cardiac arrests<br>Pulse rate < 40 per minute<br>Pulse rate > 140 per minute                                      |
| Neurology   | Sudden fall in level of consciousness<br>(Fall in Glasgow Coma Score of > 2 points)<br>Repeated or prolonged seizures |
| Other       | Any patient who does not fit the criteria above, but whom you are seriously worried about                             |

### Supplement Table 2: Modified Early Warning Score

|                                | 3   | 2     | 1      | 0       | 1                 | 2                | 3            |
|--------------------------------|-----|-------|--------|---------|-------------------|------------------|--------------|
| Systolic Blood pressure (mmHg) | <70 | 71-80 | 81-100 | 101-199 |                   | >=200            |              |
| Heart rate (bpm)               |     | <40   | 41-50  | 51-100  | 101-110           | 111-129          | >=130        |
| Respiratory rate (bpm)         |     | <9    |        | 9-14    | 15-20             | 21-29            | >=30         |
| Temperature (°C)               |     | <35   |        | 35-38.4 |                   | >=38.5           |              |
| AVPU score                     |     |       |        | Alert   | Reacting to Voice | Reacting to Pain | Unresponsive |

**Supplement Table 3: Assessment Score for Sick Patient Identification and Step-up in Treatment (ASSIST)**

|                                                                                              | 4   | 2     | 1     | 0                  | 1                                 | 2                          | 4                                     |
|----------------------------------------------------------------------------------------------|-----|-------|-------|--------------------|-----------------------------------|----------------------------|---------------------------------------|
| Blood pressure (systolic)                                                                    | <85 | 85-90 | 91-99 | 100-220            |                                   |                            | >220                                  |
| Pulse rate                                                                                   | <50 |       | 50-60 | 61-100             | 101-120                           | 121-140                    | >140                                  |
| Respiratory Rate                                                                             | <10 |       |       | 10-25              | 26-30                             | 31-40                      | >35                                   |
| Neurological Score                                                                           |     |       |       | Alert & Orientated | Confused <sup>1</sup> or Agitated | Drowsy but easily rousable | Not rousable or only by Nail pressure |
| Age (years)                                                                                  |     |       |       | < 70               | ≥ 70                              |                            |                                       |
| <sup>1</sup> Confusion should not be charted in patients with previously documented dementia |     |       |       |                    |                                   |                            |                                       |
| <b>Assessment Score for Sick patient Identification and Step-up in Treatment</b>             |     |       |       |                    |                                   |                            |                                       |
